# Supplementary material for: Glucose-dependent insulinotropic polypeptide inhibits cardiac hypertrophy and fibrosis in diabetic mice via suppression of TGF-β2
Source: PubMed Central journal article supplement — Diab Vasc Dis Res. 2022 Jan 10;18(2):1479164121999034. doi: 10.1177/1479164121999034 (PMC8755933; doi:10.1177/1479164121999034), 2022-01-10
Supplement: sj-pdf-1-dvr-10.1177_1479164121999034.pdf [file sj-pdf-1-dvr-10.1177_1479164121999034.pdf]

**Table 1. Body weights and plasma glucose levels of free-fed wild-type and diet-restricted db/db mice at 8 weeks of age**

|                                       | Free-fed<br>wild-type mice | Diet-restricted<br>db/db mice |
|---------------------------------------|----------------------------|-------------------------------|
| Number                                | 3                          | 3                             |
| Body weight (g)                       | 26.4 ± 0.7                 | 25.8 ± 0.5                    |
| Fasting plasma glucose levels (mg/dL) | 116 ± 24                   | 124 ± 9                       |

Mean ± standard deviation.
